# Supplementary material
Source: PubMed Central journal article supplement (PMC9525229)
Supplement: 40261_2022_1205_MOESM1_ESM.pdf [file 40261_2022_1205_MOESM1_ESM.pdf]

Cover page

Journal: Clinical Drug Investigation

Title: Effects of cannabidiol on appetite and body weight: a systematic review

Authors: Joaquim S. Pinto<sup>1</sup>, Fátima Martel<sup>2</sup>

<sup>1</sup>Faculty of Medicine, University of Porto, Porto, Portugal

<sup>2</sup>Department of Biomedicine – Unit of Biochemistry, Faculty of Medicine, University of  
Porto, Porto, Portugal

Supplementary Table 1 - Summary table of risk of bias assessment using Cochrane's RoB2 tool of Aran et al. (2021) [19]

| Ref or Label                                                            | Aran et al. (2021) [19]                                                                                                                                                | Aim | assignment to intervention (the 'intention-to-treat' effect) |
|-------------------------------------------------------------------------|------------------------------------------------------------------------------------------------------------------------------------------------------------------------|-----|--------------------------------------------------------------|
| Domain                                                                  | Signalling question                                                                                                                                                    |     | Response                                                     |
| <b>Bias arising from the randomization process</b>                      | 1.1 Was the allocation sequence random?                                                                                                                                |     | Y                                                            |
|                                                                         | 1.2 Was the allocation sequence concealed until participants were enrolled and assigned to interventions?                                                              |     | Y                                                            |
|                                                                         | 1.3 Did baseline differences between intervention groups suggest a problem with the randomization process?                                                             |     | N                                                            |
|                                                                         | <b>Risk of bias judgement</b>                                                                                                                                          |     | <b>Low</b>                                                   |
| <b>Domain S: Risk of bias arising from period and carryover effects</b> | S.1 Was the number of participants allocated to each of the two sequences equal or nearly equal?                                                                       |     | Y                                                            |
|                                                                         | S.2 If N/PN/NI to S.1: Were period effects accounted for in the analysis?                                                                                              |     | NA                                                           |
|                                                                         | S.3 Was there sufficient time for any carryover effects to have disappeared before outcome assessment in the second period?                                            |     | Y                                                            |
|                                                                         | <b>Risk of bias judgement</b>                                                                                                                                          |     | <b>Low</b>                                                   |
| <b>Bias due to deviations from intended interventions</b>               | 2.1. Were participants aware of their assigned intervention during the trial?                                                                                          |     | N                                                            |
|                                                                         | 2.2. Were carers and people delivering the interventions aware of participants' assigned intervention during the trial?                                                |     | N                                                            |
|                                                                         | 2.3. If Y/PY/NI to 2.1 or 2.2: Were there deviations from the intended intervention that arose because of the experimental context?                                    |     | NA                                                           |
|                                                                         | 2.4 If Y/PY to 2.3: Were these deviations likely to have affected the outcome?                                                                                         |     | NA                                                           |
|                                                                         | 2.5. If Y/PY/NI to 2.4: Were these deviations from intended intervention balanced between groups?                                                                      |     | NA                                                           |
|                                                                         | 2.6 Was an appropriate analysis used to estimate the effect of assignment to intervention?                                                                             |     | PY                                                           |
|                                                                         | 2.7 If N/PN/NI to 2.6: Was there potential for a substantial impact (on the result) of the failure to analyse participants in the group to which they were randomized? |     | NA                                                           |
|                                                                         | <b>Risk of bias judgement</b>                                                                                                                                          |     | <b>Low</b>                                                   |
| <b>Bias due to missing outcome data</b>                                 | 3.1 Were data for this outcome available for all, or nearly all, participants randomized?                                                                              |     | N                                                            |
|                                                                         | 3.2 If N/PN/NI to 3.1: Is there evidence that result was not biased by missing outcome data?                                                                           |     | N                                                            |
|                                                                         | 3.3 If N/PN to 3.2: Could missingness in the outcome depend on its true value?                                                                                         |     | N                                                            |
|                                                                         | 3.4 If Y/PY/NI to 3.3: Is it likely that missingness in the outcome depended on its true value?                                                                        |     | NA                                                           |
|                                                                         | <b>Risk of bias judgement</b>                                                                                                                                          |     | <b>Low</b>                                                   |
| <b>Bias in measurement of the outcome</b>                               | 4.1 Was the method of measuring the outcome inappropriate?                                                                                                             |     | N                                                            |

|                                                 |                                                                                                                                                                                     |            |
|-------------------------------------------------|-------------------------------------------------------------------------------------------------------------------------------------------------------------------------------------|------------|
|                                                 | 4.2 Could measurement or ascertainment of the outcome have differed between intervention groups?                                                                                    | N          |
|                                                 | 4.3 Were outcome assessors aware of the intervention received by study participants?                                                                                                | N          |
|                                                 | 4.4 If Y/PY/NI to 4.3: Could assessment of the outcome have been influenced by knowledge of intervention received?                                                                  | NA         |
|                                                 | 4.5 If Y/PY/NI to 4.4: Is it likely that assessment of the outcome was influenced by knowledge of intervention received?                                                            | NA         |
|                                                 | <b>Risk of bias judgement</b>                                                                                                                                                       | <b>Low</b> |
| <b>Bias in selection of the reported result</b> | 5.1 Were the data that produced this result analysed in accordance with a pre-specified analysis plan that was finalized before unblinded outcome data were available for analysis? | Y          |
|                                                 | 5.2 ... multiple eligible outcome measurements (e.g. scales, definitions, time points) within the outcome domain?                                                                   | N          |
|                                                 | 5.3 ... multiple eligible analyses of the data?                                                                                                                                     | N          |
|                                                 | 5.4 Is a result based on data from both periods sought, but unavailable on the basis of carryover having been identified?                                                           | N          |
|                                                 | <b>Risk of bias judgement</b>                                                                                                                                                       | <b>Low</b> |
| <b>Overall bias</b>                             | <b>Risk of bias judgement</b>                                                                                                                                                       | <b>Low</b> |

Supplementary Table 2 - Summary table of risk of bias assessment using Cochrane's RoB2 tool of Crippa et al. (2021) [20]

| Ref or Label                                       | Crippa et al. (2021) [20]                                                                                                                                              | Aim | assignment to intervention (the 'intention-to-treat' effect) |
|----------------------------------------------------|------------------------------------------------------------------------------------------------------------------------------------------------------------------------|-----|--------------------------------------------------------------|
| Domain                                             | Signalling question                                                                                                                                                    |     | Response                                                     |
| Bias arising from the randomization process        | 1.1 Was the allocation sequence random?                                                                                                                                |     | Y                                                            |
|                                                    | 1.2 Was the allocation sequence concealed until participants were enrolled and assigned to interventions?                                                              |     | Y                                                            |
|                                                    | 1.3 Did baseline differences between intervention groups suggest a problem with the randomization process?                                                             |     | N                                                            |
|                                                    | <b>Risk of bias judgement</b>                                                                                                                                          |     | <b>Low</b>                                                   |
| Bias due to deviations from intended interventions | 2.1. Were participants aware of their assigned intervention during the trial?                                                                                          |     | N                                                            |
|                                                    | 2.2. Were carers and people delivering the interventions aware of participants' assigned intervention during the trial?                                                |     | N                                                            |
|                                                    | 2.3. If Y/PY/NI to 2.1 or 2.2: Were there deviations from the intended intervention that arose because of the experimental context?                                    |     | NA                                                           |
|                                                    | 2.4 If Y/PY to 2.3: Were these deviations likely to have affected the outcome?                                                                                         |     | NA                                                           |
|                                                    | 2.5. If Y/PY/NI to 2.4: Were these deviations from intended intervention balanced between groups?                                                                      |     | NA                                                           |
|                                                    | 2.6 Was an appropriate analysis used to estimate the effect of assignment to intervention?                                                                             |     | PY                                                           |
|                                                    | 2.7 If N/PN/NI to 2.6: Was there potential for a substantial impact (on the result) of the failure to analyse participants in the group to which they were randomized? |     | NA                                                           |
|                                                    | <b>Risk of bias judgement</b>                                                                                                                                          |     | <b>Low</b>                                                   |
| Bias due to missing outcome data                   | 3.1 Were data for this outcome available for all, or nearly all, participants randomized?                                                                              |     | N                                                            |
|                                                    | 3.2 If N/PN/NI to 3.1: Is there evidence that result was not biased by missing outcome data?                                                                           |     | N                                                            |
|                                                    | 3.3 If N/PN to 3.2: Could missingness in the outcome depend on its true value?                                                                                         |     | N                                                            |
|                                                    | 3.4 If Y/PY/NI to 3.3: Is it likely that missingness in the outcome depended on its true value?                                                                        |     | NA                                                           |
|                                                    | <b>Risk of bias judgement</b>                                                                                                                                          |     | <b>Low</b>                                                   |
| Bias in measurement of the outcome                 | 4.1 Was the method of measuring the outcome inappropriate?                                                                                                             |     | PN                                                           |
|                                                    | 4.2 Could measurement or ascertainment of the outcome have differed between intervention groups?                                                                       |     | N                                                            |
|                                                    | 4.3 Were outcome assessors aware of the intervention received by study participants?                                                                                   |     | N                                                            |
|                                                    | 4.4 If Y/PY/NI to 4.3: Could assessment of the outcome have been influenced by knowledge of intervention received?                                                     |     | NA                                                           |
|                                                    | 4.5 If Y/PY/NI to 4.4: Is it likely that assessment of the outcome was influenced by knowledge of intervention received?                                               |     | NA                                                           |

|                                                 |                                                                                                                                                                                     |            |
|-------------------------------------------------|-------------------------------------------------------------------------------------------------------------------------------------------------------------------------------------|------------|
|                                                 | <b>Risk of bias judgement</b>                                                                                                                                                       | <b>Low</b> |
| <b>Bias in selection of the reported result</b> | 5.1 Were the data that produced this result analysed in accordance with a pre-specified analysis plan that was finalized before unblinded outcome data were available for analysis? | Y          |
|                                                 | 5.2 ... multiple eligible outcome measurements (e.g. scales, definitions, time points) within the outcome domain?                                                                   | N          |
|                                                 | 5.3 ... multiple eligible analyses of the data?                                                                                                                                     | N          |
|                                                 | <b>Risk of bias judgement</b>                                                                                                                                                       | <b>Low</b> |
| <b>Overall bias</b>                             | <b>Risk of bias judgement</b>                                                                                                                                                       | <b>Low</b> |

**Supplementary Table 3 - Summary table of risk of bias assessment using Cochrane's RoB2 tool of de Bruijn et al. (2017) [23]**

| Ref or Label                                                            | de Bruijn et al. (2017) [23]                                                                                                                                           | Aim        | assignment to intervention (the 'intention-to-treat' effect) |
|-------------------------------------------------------------------------|------------------------------------------------------------------------------------------------------------------------------------------------------------------------|------------|--------------------------------------------------------------|
| Domain                                                                  | Signalling question                                                                                                                                                    | Response   |                                                              |
| <b>Bias arising from the randomization process</b>                      | 1.1 Was the allocation sequence random?                                                                                                                                | Y          |                                                              |
|                                                                         | 1.2 Was the allocation sequence concealed until participants were enrolled and assigned to interventions?                                                              | Y          |                                                              |
|                                                                         | 1.3 Did baseline differences between intervention groups suggest a problem with the randomization process?                                                             | NI         |                                                              |
|                                                                         | <b>Risk of bias judgement</b>                                                                                                                                          | <b>Low</b> |                                                              |
| <b>Domain S: Risk of bias arising from period and carryover effects</b> | S.1 Was the number of participants allocated to each of the two sequences equal or nearly equal?                                                                       | Y          |                                                              |
|                                                                         | S.2 If N/PN/NI to S.1: Were period effects accounted for in the analysis?                                                                                              | NA         |                                                              |
|                                                                         | S.3 Was there sufficient time for any carryover effects to have disappeared before outcome assessment in the second period?                                            | PY         |                                                              |
|                                                                         | <b>Risk of bias judgement</b>                                                                                                                                          | <b>Low</b> |                                                              |
| <b>Bias due to deviations from intended interventions</b>               | 2.1. Were participants aware of their assigned intervention during the trial?                                                                                          | N          |                                                              |
|                                                                         | 2.2. Were carers and people delivering the interventions aware of participants' assigned intervention during the trial?                                                | N          |                                                              |
|                                                                         | 2.3. If Y/PY/NI to 2.1 or 2.2: Were there deviations from the intended intervention that arose because of the experimental context?                                    | NA         |                                                              |
|                                                                         | 2.4 If Y/PY to 2.3: Were these deviations likely to have affected the outcome?                                                                                         | NA         |                                                              |
|                                                                         | 2.5. If Y/PY/NI to 2.4: Were these deviations from intended intervention balanced between groups?                                                                      | NA         |                                                              |
|                                                                         | 2.6 Was an appropriate analysis used to estimate the effect of assignment to intervention?                                                                             | PY         |                                                              |
|                                                                         | 2.7 If N/PN/NI to 2.6: Was there potential for a substantial impact (on the result) of the failure to analyse participants in the group to which they were randomized? | NA         |                                                              |
|                                                                         | <b>Risk of bias judgement</b>                                                                                                                                          | <b>Low</b> |                                                              |
| <b>Bias due to missing outcome data</b>                                 | 3.1 Were data for this outcome available for all, or nearly all, participants randomized?                                                                              | N          |                                                              |
|                                                                         | 3.2 If N/PN/NI to 3.1: Is there evidence that result was not biased by missing outcome data?                                                                           | N          |                                                              |
|                                                                         | 3.3 If N/PN to 3.2: Could missingness in the outcome depend on its true value?                                                                                         | N          |                                                              |
|                                                                         | 3.4 If Y/PY/NI to 3.3: Is it likely that missingness in the outcome depended on its true value?                                                                        | NA         |                                                              |
|                                                                         | <b>Risk of bias judgement</b>                                                                                                                                          | <b>Low</b> |                                                              |
| <b>Bias in measurement of the outcome</b>                               | 4.1 Was the method of measuring the outcome inappropriate?                                                                                                             | N          |                                                              |

|                                                 |                                                                                                                                                                                     |                      |
|-------------------------------------------------|-------------------------------------------------------------------------------------------------------------------------------------------------------------------------------------|----------------------|
|                                                 | 4.2 Could measurement or ascertainment of the outcome have differed between intervention groups?                                                                                    | N                    |
|                                                 | 4.3 Were outcome assessors aware of the intervention received by study participants?                                                                                                | N                    |
|                                                 | 4.4 If Y/PY/NI to 4.3: Could assessment of the outcome have been influenced by knowledge of intervention received?                                                                  | NA                   |
|                                                 | 4.5 If Y/PY/NI to 4.4: Is it likely that assessment of the outcome was influenced by knowledge of intervention received?                                                            | NA                   |
|                                                 | <b>Risk of bias judgement</b>                                                                                                                                                       | <b>Low</b>           |
| <b>Bias in selection of the reported result</b> | 5.1 Were the data that produced this result analysed in accordance with a pre-specified analysis plan that was finalized before unblinded outcome data were available for analysis? | NI                   |
|                                                 | 5.2 ... multiple eligible outcome measurements (e.g. scales, definitions, time points) within the outcome domain?                                                                   | N                    |
|                                                 | 5.3 ... multiple eligible analyses of the data?                                                                                                                                     | N                    |
|                                                 | 5.4 Is a result based on data from both periods sought, but unavailable on the basis of carryover having been identified?                                                           | NI                   |
|                                                 | <b>Risk of bias judgement</b>                                                                                                                                                       | <b>Some concerns</b> |
| <b>Overall bias</b>                             | <b>Risk of bias judgement</b>                                                                                                                                                       | <b>Some concerns</b> |

**Supplementary Table 4 - Summary table of risk of bias assessment using Cochrane's RoB2 tool of Devinsky et al. (2017) [14]**

| Ref or Label                                              | Devinsky et al. (2017) [14]                                                                                                                                            | Aim | assignment to intervention (the 'intention-to-treat' effect) |
|-----------------------------------------------------------|------------------------------------------------------------------------------------------------------------------------------------------------------------------------|-----|--------------------------------------------------------------|
| Domain                                                    | Signalling question                                                                                                                                                    |     | Response                                                     |
| <b>Bias arising from the randomization process</b>        | 1.1 Was the allocation sequence random?                                                                                                                                |     | Y                                                            |
|                                                           | 1.2 Was the allocation sequence concealed until participants were enrolled and assigned to interventions?                                                              |     | Y                                                            |
|                                                           | 1.3 Did baseline differences between intervention groups suggest a problem with the randomization process?                                                             |     | N                                                            |
|                                                           | <b>Risk of bias judgement</b>                                                                                                                                          |     | <b>Low</b>                                                   |
| <b>Bias due to deviations from intended interventions</b> | 2.1. Were participants aware of their assigned intervention during the trial?                                                                                          |     | N                                                            |
|                                                           | 2.2. Were carers and people delivering the interventions aware of participants' assigned intervention during the trial?                                                |     | N                                                            |
|                                                           | 2.3. If Y/PY/NI to 2.1 or 2.2: Were there deviations from the intended intervention that arose because of the experimental context?                                    |     | NA                                                           |
|                                                           | 2.4 If Y/PY to 2.3: Were these deviations likely to have affected the outcome?                                                                                         |     | NA                                                           |
|                                                           | 2.5. If Y/PY/NI to 2.4: Were these deviations from intended intervention balanced between groups?                                                                      |     | NA                                                           |
|                                                           | 2.6 Was an appropriate analysis used to estimate the effect of assignment to intervention?                                                                             |     | Y                                                            |
|                                                           | 2.7 If N/PN/NI to 2.6: Was there potential for a substantial impact (on the result) of the failure to analyse participants in the group to which they were randomized? |     | NA                                                           |
|                                                           | <b>Risk of bias judgement</b>                                                                                                                                          |     | <b>Low</b>                                                   |
| <b>Bias due to missing outcome data</b>                   | 3.1 Were data for this outcome available for all, or nearly all, participants randomized?                                                                              |     | N                                                            |
|                                                           | 3.2 If N/PN/NI to 3.1: Is there evidence that result was not biased by missing outcome data?                                                                           |     | N                                                            |
|                                                           | 3.3 If N/PN to 3.2: Could missingness in the outcome depend on its true value?                                                                                         |     | PY                                                           |
|                                                           | 3.4 If Y/PY/NI to 3.3: Is it likely that missingness in the outcome depended on its true value?                                                                        |     | PN                                                           |
|                                                           | <b>Risk of bias judgement</b>                                                                                                                                          |     | <b>Some concerns</b>                                         |
| <b>Bias in measurement of the outcome</b>                 | 4.1 Was the method of measuring the outcome inappropriate?                                                                                                             |     | N                                                            |
|                                                           | 4.2 Could measurement or ascertainment of the outcome have differed between intervention groups?                                                                       |     | N                                                            |
|                                                           | 4.3 Were outcome assessors aware of the intervention received by study participants?                                                                                   |     | PN                                                           |
|                                                           | 4.4 If Y/PY/NI to 4.3: Could assessment of the outcome have been influenced by knowledge of intervention received?                                                     |     | NA                                                           |
|                                                           | 4.5 If Y/PY/NI to 4.4: Is it likely that assessment of the outcome was influenced by knowledge of intervention received?                                               |     | NA                                                           |



|                                                 |                                                                                                                                                                                     |                      |
|-------------------------------------------------|-------------------------------------------------------------------------------------------------------------------------------------------------------------------------------------|----------------------|
|                                                 | <b>Risk of bias judgement</b>                                                                                                                                                       | <b>Low</b>           |
| <b>Bias in selection of the reported result</b> | 5.1 Were the data that produced this result analysed in accordance with a pre-specified analysis plan that was finalized before unblinded outcome data were available for analysis? | PY                   |
|                                                 | 5.2 ... multiple eligible outcome measurements (e.g. scales, definitions, time points) within the outcome domain?                                                                   | PN                   |
|                                                 | 5.3 ... multiple eligible analyses of the data?                                                                                                                                     | PN                   |
|                                                 | <b>Risk of bias judgement</b>                                                                                                                                                       | <b>Low</b>           |
| <b>Overall bias</b>                             | <b>Risk of bias judgement</b>                                                                                                                                                       | <b>Some concerns</b> |

**Supplementary Table 5 - Summary table of risk of bias assessment using Cochrane's RoB2 tool of Devinsky et al. (2018) [17]**

| Ref or Label                                              | Devinsky et al. (2018) [17]                                                                                                                                            | Aim | assignment to intervention (the 'intention-to-treat' effect) |
|-----------------------------------------------------------|------------------------------------------------------------------------------------------------------------------------------------------------------------------------|-----|--------------------------------------------------------------|
| Domain                                                    | Signalling question                                                                                                                                                    |     | Response                                                     |
| <b>Bias arising from the randomization process</b>        | 1.1 Was the allocation sequence random?                                                                                                                                |     | Y                                                            |
|                                                           | 1.2 Was the allocation sequence concealed until participants were enrolled and assigned to interventions?                                                              |     | PY                                                           |
|                                                           | 1.3 Did baseline differences between intervention groups suggest a problem with the randomization process?                                                             |     | N                                                            |
|                                                           | <b>Risk of bias judgement</b>                                                                                                                                          |     | <b>Low</b>                                                   |
| <b>Bias due to deviations from intended interventions</b> | 2.1. Were participants aware of their assigned intervention during the trial?                                                                                          |     | N                                                            |
|                                                           | 2.2. Were carers and people delivering the interventions aware of participants' assigned intervention during the trial?                                                |     | N                                                            |
|                                                           | 2.3. If Y/PY/NI to 2.1 or 2.2: Were there deviations from the intended intervention that arose because of the experimental context?                                    |     | NA                                                           |
|                                                           | 2.4 If Y/PY to 2.3: Were these deviations likely to have affected the outcome?                                                                                         |     | NA                                                           |
|                                                           | 2.5. If Y/PY/NI to 2.4: Were these deviations from intended intervention balanced between groups?                                                                      |     | NA                                                           |
|                                                           | 2.6 Was an appropriate analysis used to estimate the effect of assignment to intervention?                                                                             |     | Y                                                            |
|                                                           | 2.7 If N/PN/NI to 2.6: Was there potential for a substantial impact (on the result) of the failure to analyse participants in the group to which they were randomized? |     | NA                                                           |
|                                                           | <b>Risk of bias judgement</b>                                                                                                                                          |     | <b>Low</b>                                                   |
| <b>Bias due to missing outcome data</b>                   | 3.1 Were data for this outcome available for all, or nearly all, participants randomized?                                                                              |     | N                                                            |
|                                                           | 3.2 If N/PN/NI to 3.1: Is there evidence that result was not biased by missing outcome data?                                                                           |     | N                                                            |
|                                                           | 3.3 If N/PN to 3.2: Could missingness in the outcome depend on its true value?                                                                                         |     | Y                                                            |
|                                                           | 3.4 If Y/PY/NI to 3.3: Is it likely that missingness in the outcome depended on its true value?                                                                        |     | PN                                                           |
|                                                           | <b>Risk of bias judgement</b>                                                                                                                                          |     | <b>Some concerns</b>                                         |
| <b>Bias in measurement of the outcome</b>                 | 4.1 Was the method of measuring the outcome inappropriate?                                                                                                             |     | N                                                            |
|                                                           | 4.2 Could measurement or ascertainment of the outcome have differed between intervention groups?                                                                       |     | N                                                            |
|                                                           | 4.3 Were outcome assessors aware of the intervention received by study participants?                                                                                   |     | N                                                            |
|                                                           | 4.4 If Y/PY/NI to 4.3: Could assessment of the outcome have been influenced by knowledge of intervention received?                                                     |     | NA                                                           |
|                                                           | 4.5 If Y/PY/NI to 4.4: Is it likely that assessment of the outcome was influenced by knowledge of intervention received?                                               |     | NA                                                           |

|                                                 |                                                                                                                                                                                     |                      |
|-------------------------------------------------|-------------------------------------------------------------------------------------------------------------------------------------------------------------------------------------|----------------------|
|                                                 | <b>Risk of bias judgement</b>                                                                                                                                                       | <b>Low</b>           |
| <b>Bias in selection of the reported result</b> | 5.1 Were the data that produced this result analysed in accordance with a pre-specified analysis plan that was finalized before unblinded outcome data were available for analysis? | Y                    |
|                                                 | 5.2 ... multiple eligible outcome measurements (e.g. scales, definitions, time points) within the outcome domain?                                                                   | N                    |
|                                                 | 5.3 ... multiple eligible analyses of the data?                                                                                                                                     | N                    |
|                                                 | <b>Risk of bias judgement</b>                                                                                                                                                       | <b>Low</b>           |
| <b>Overall bias</b>                             | <b>Risk of bias judgement</b>                                                                                                                                                       | <b>Some concerns</b> |

**Supplementary Table 6 - Summary table of risk of bias assessment using Cochrane's RoB2 tool of Devinsky et al. (2018)**  
[15]

| Ref or Label                                              | Devinsky et al. (2018)<br>[15]                                                                                                                                         | Aim | assignment to intervention (the 'intention-to-treat' effect) |
|-----------------------------------------------------------|------------------------------------------------------------------------------------------------------------------------------------------------------------------------|-----|--------------------------------------------------------------|
| Domain                                                    | Signalling question                                                                                                                                                    |     | Response                                                     |
| <b>Bias arising from the randomization process</b>        | 1.1 Was the allocation sequence random?                                                                                                                                |     | Y                                                            |
|                                                           | 1.2 Was the allocation sequence concealed until participants were enrolled and assigned to interventions?                                                              |     | PY                                                           |
|                                                           | 1.3 Did baseline differences between intervention groups suggest a problem with the randomization process?                                                             |     | N                                                            |
|                                                           | <b>Risk of bias judgement</b>                                                                                                                                          |     | <b>Low</b>                                                   |
| <b>Bias due to deviations from intended interventions</b> | 2.1. Were participants aware of their assigned intervention during the trial?                                                                                          |     | PN                                                           |
|                                                           | 2.2. Were carers and people delivering the interventions aware of participants' assigned intervention during the trial?                                                |     | PN                                                           |
|                                                           | 2.3. If Y/PY/NI to 2.1 or 2.2: Were there deviations from the intended intervention that arose because of the experimental context?                                    |     | NA                                                           |
|                                                           | 2.4 If Y/PY to 2.3: Were these deviations likely to have affected the outcome?                                                                                         |     | NA                                                           |
|                                                           | 2.5. If Y/PY/NI to 2.4: Were these deviations from intended intervention balanced between groups?                                                                      |     | NA                                                           |
|                                                           | 2.6 Was an appropriate analysis used to estimate the effect of assignment to intervention?                                                                             |     | PY                                                           |
|                                                           | 2.7 If N/PN/NI to 2.6: Was there potential for a substantial impact (on the result) of the failure to analyse participants in the group to which they were randomized? |     | NA                                                           |
|                                                           | <b>Risk of bias judgement</b>                                                                                                                                          |     | <b>Low</b>                                                   |
| <b>Bias due to missing outcome data</b>                   | 3.1 Were data for this outcome available for all, or nearly all, participants randomized?                                                                              |     | PY                                                           |
|                                                           | 3.2 If N/PN/NI to 3.1: Is there evidence that result was not biased by missing outcome data?                                                                           |     | NA                                                           |
|                                                           | 3.3 If N/PN to 3.2: Could missingness in the outcome depend on its true value?                                                                                         |     | NA                                                           |
|                                                           | 3.4 If Y/PY/NI to 3.3: Is it likely that missingness in the outcome depended on its true value?                                                                        |     | NA                                                           |
|                                                           | <b>Risk of bias judgement</b>                                                                                                                                          |     | <b>Low</b>                                                   |
| <b>Bias in measurement of the outcome</b>                 | 4.1 Was the method of measuring the outcome inappropriate?                                                                                                             |     | N                                                            |
|                                                           | 4.2 Could measurement or ascertainment of the outcome have differed between intervention groups?                                                                       |     | N                                                            |
|                                                           | 4.3 Were outcome assessors aware of the intervention received by study participants?                                                                                   |     | PN                                                           |
|                                                           | 4.4 If Y/PY/NI to 4.3: Could assessment of the outcome have been influenced by knowledge of intervention received?                                                     |     | NA                                                           |
|                                                           | 4.5 If Y/PY/NI to 4.4: Is it likely that assessment of the outcome was influenced by knowledge of intervention received?                                               |     | NA                                                           |

|                                                 |                                                                                                                                                                                     |                      |
|-------------------------------------------------|-------------------------------------------------------------------------------------------------------------------------------------------------------------------------------------|----------------------|
|                                                 | <b>Risk of bias judgement</b>                                                                                                                                                       | <b>Low</b>           |
| <b>Bias in selection of the reported result</b> | 5.1 Were the data that produced this result analysed in accordance with a pre-specified analysis plan that was finalized before unblinded outcome data were available for analysis? | NI                   |
|                                                 | 5.2 ... multiple eligible outcome measurements (e.g. scales, definitions, time points) within the outcome domain?                                                                   | N                    |
|                                                 | 5.3 ... multiple eligible analyses of the data?                                                                                                                                     | PN                   |
|                                                 | <b>Risk of bias judgement</b>                                                                                                                                                       | <b>Some concerns</b> |
| <b>Overall bias</b>                             | <b>Risk of bias judgement</b>                                                                                                                                                       | <b>Some concerns</b> |

**Supplementary Table 7 - Summary table of risk of bias assessment using Cochrane's RoB2 tool of Hundal et al. (2018) [22]**

| Ref or Label                                              | Hundal et al. (2018) [22]                                                                                                                                              | Aim | assignment to intervention (the 'intention-to-treat' effect) |
|-----------------------------------------------------------|------------------------------------------------------------------------------------------------------------------------------------------------------------------------|-----|--------------------------------------------------------------|
| Domain                                                    | Signalling question                                                                                                                                                    |     | Response                                                     |
| <b>Bias arising from the randomization process</b>        | 1.1 Was the allocation sequence random?                                                                                                                                |     | Y                                                            |
|                                                           | 1.2 Was the allocation sequence concealed until participants were enrolled and assigned to interventions?                                                              |     | Y                                                            |
|                                                           | 1.3 Did baseline differences between intervention groups suggest a problem with the randomization process?                                                             |     | N                                                            |
|                                                           | <b>Risk of bias judgement</b>                                                                                                                                          |     | <b>Low</b>                                                   |
| <b>Bias due to deviations from intended interventions</b> | 2.1. Were participants aware of their assigned intervention during the trial?                                                                                          |     | N                                                            |
|                                                           | 2.2. Were carers and people delivering the interventions aware of participants' assigned intervention during the trial?                                                |     | N                                                            |
|                                                           | 2.3. If Y/PY/NI to 2.1 or 2.2: Were there deviations from the intended intervention that arose because of the experimental context?                                    |     | NA                                                           |
|                                                           | 2.4 If Y/PY to 2.3: Were these deviations likely to have affected the outcome?                                                                                         |     | NA                                                           |
|                                                           | 2.5. If Y/PY/NI to 2.4: Were these deviations from intended intervention balanced between groups?                                                                      |     | NA                                                           |
|                                                           | 2.6 Was an appropriate analysis used to estimate the effect of assignment to intervention?                                                                             |     | Y                                                            |
|                                                           | 2.7 If N/PN/NI to 2.6: Was there potential for a substantial impact (on the result) of the failure to analyse participants in the group to which they were randomized? |     | NA                                                           |
|                                                           | <b>Risk of bias judgement</b>                                                                                                                                          |     | <b>Low</b>                                                   |
| <b>Bias due to missing outcome data</b>                   | 3.1 Were data for this outcome available for all, or nearly all, participants randomized?                                                                              |     | PY                                                           |
|                                                           | 3.2 If N/PN/NI to 3.1: Is there evidence that result was not biased by missing outcome data?                                                                           |     | NA                                                           |
|                                                           | 3.3 If N/PN to 3.2: Could missingness in the outcome depend on its true value?                                                                                         |     | NA                                                           |
|                                                           | 3.4 If Y/PY/NI to 3.3: Is it likely that missingness in the outcome depended on its true value?                                                                        |     | NA                                                           |
|                                                           | <b>Risk of bias judgement</b>                                                                                                                                          |     | <b>Low</b>                                                   |
| <b>Bias in measurement of the outcome</b>                 | 4.1 Was the method of measuring the outcome inappropriate?                                                                                                             |     | N                                                            |
|                                                           | 4.2 Could measurement or ascertainment of the outcome have differed between intervention groups?                                                                       |     | N                                                            |
|                                                           | 4.3 Were outcome assessors aware of the intervention received by study participants?                                                                                   |     | PN                                                           |
|                                                           | 4.4 If Y/PY/NI to 4.3: Could assessment of the outcome have been influenced by knowledge of intervention received?                                                     |     | NA                                                           |
|                                                           | 4.5 If Y/PY/NI to 4.4: Is it likely that assessment of the outcome was influenced by knowledge of intervention received?                                               |     | NA                                                           |

|                                                 |                                                                                                                                                                                     |            |
|-------------------------------------------------|-------------------------------------------------------------------------------------------------------------------------------------------------------------------------------------|------------|
|                                                 | <b>Risk of bias judgement</b>                                                                                                                                                       | <b>Low</b> |
| <b>Bias in selection of the reported result</b> | 5.1 Were the data that produced this result analysed in accordance with a pre-specified analysis plan that was finalized before unblinded outcome data were available for analysis? | Y          |
|                                                 | 5.2 ... multiple eligible outcome measurements (e.g. scales, definitions, time points) within the outcome domain?                                                                   | N          |
|                                                 | 5.3 ... multiple eligible analyses of the data?                                                                                                                                     | N          |
|                                                 | <b>Risk of bias judgement</b>                                                                                                                                                       | <b>Low</b> |
| <b>Overall bias</b>                             | <b>Risk of bias judgement</b>                                                                                                                                                       | <b>Low</b> |

**Supplementary Table 8 - Summary table of risk of bias assessment using Cochrane's RoB2 tool of Jadoon et al. (2016) [13]**

| Ref or Label                                              | Jadoon et al. (2016) [13]                                                                                                                                              | Aim | assignment to intervention (the 'intention-to-treat' effect) |
|-----------------------------------------------------------|------------------------------------------------------------------------------------------------------------------------------------------------------------------------|-----|--------------------------------------------------------------|
| Domain                                                    | Signalling question                                                                                                                                                    |     | Response                                                     |
| <b>Bias arising from the randomization process</b>        | 1.1 Was the allocation sequence random?                                                                                                                                |     | Y                                                            |
|                                                           | 1.2 Was the allocation sequence concealed until participants were enrolled and assigned to interventions?                                                              |     | Y                                                            |
|                                                           | 1.3 Did baseline differences between intervention groups suggest a problem with the randomization process?                                                             |     | N                                                            |
|                                                           | <b>Risk of bias judgement</b>                                                                                                                                          |     | <b>Low</b>                                                   |
| <b>Bias due to deviations from intended interventions</b> | 2.1. Were participants aware of their assigned intervention during the trial?                                                                                          |     | N                                                            |
|                                                           | 2.2. Were carers and people delivering the interventions aware of participants' assigned intervention during the trial?                                                |     | N                                                            |
|                                                           | 2.3. If Y/PY/NI to 2.1 or 2.2: Were there deviations from the intended intervention that arose because of the experimental context?                                    |     | NA                                                           |
|                                                           | 2.4 If Y/PY to 2.3: Were these deviations likely to have affected the outcome?                                                                                         |     | NA                                                           |
|                                                           | 2.5. If Y/PY/NI to 2.4: Were these deviations from intended intervention balanced between groups?                                                                      |     | NA                                                           |
|                                                           | 2.6 Was an appropriate analysis used to estimate the effect of assignment to intervention?                                                                             |     | Y                                                            |
|                                                           | 2.7 If N/PN/NI to 2.6: Was there potential for a substantial impact (on the result) of the failure to analyse participants in the group to which they were randomized? |     | NA                                                           |
|                                                           | <b>Risk of bias judgement</b>                                                                                                                                          |     | <b>Low</b>                                                   |
| <b>Bias due to missing outcome data</b>                   | 3.1 Were data for this outcome available for all, or nearly all, participants randomized?                                                                              |     | Y                                                            |
|                                                           | 3.2 If N/PN/NI to 3.1: Is there evidence that result was not biased by missing outcome data?                                                                           |     | NA                                                           |
|                                                           | 3.3 If N/PN to 3.2: Could missingness in the outcome depend on its true value?                                                                                         |     | NA                                                           |
|                                                           | 3.4 If Y/PY/NI to 3.3: Is it likely that missingness in the outcome depended on its true value?                                                                        |     | NA                                                           |
|                                                           | <b>Risk of bias judgement</b>                                                                                                                                          |     | <b>Low</b>                                                   |
| <b>Bias in measurement of the outcome</b>                 | 4.1 Was the method of measuring the outcome inappropriate?                                                                                                             |     | N                                                            |
|                                                           | 4.2 Could measurement or ascertainment of the outcome have differed between intervention groups?                                                                       |     | N                                                            |
|                                                           | 4.3 Were outcome assessors aware of the intervention received by study participants?                                                                                   |     | N                                                            |
|                                                           | 4.4 If Y/PY/NI to 4.3: Could assessment of the outcome have been influenced by knowledge of intervention received?                                                     |     | NA                                                           |
|                                                           | 4.5 If Y/PY/NI to 4.4: Is it likely that assessment of the outcome was influenced by knowledge of intervention received?                                               |     | NA                                                           |



|                                                 |                                                                                                                                                                                     |            |
|-------------------------------------------------|-------------------------------------------------------------------------------------------------------------------------------------------------------------------------------------|------------|
|                                                 | <b>Risk of bias judgement</b>                                                                                                                                                       | <b>Low</b> |
| <b>Bias in selection of the reported result</b> | 5.1 Were the data that produced this result analysed in accordance with a pre-specified analysis plan that was finalized before unblinded outcome data were available for analysis? | PY         |
|                                                 | 5.2 ... multiple eligible outcome measurements (e.g. scales, definitions, time points) within the outcome domain?                                                                   | N          |
|                                                 | 5.3 ... multiple eligible analyses of the data?                                                                                                                                     | N          |
|                                                 | <b>Risk of bias judgement</b>                                                                                                                                                       | <b>Low</b> |
| <b>Overall bias</b>                             | <b>Risk of bias judgement</b>                                                                                                                                                       | <b>Low</b> |

Supplementary Table 9 - Summary table of risk of bias assessment using Cochrane's RoB2 tool of Miller et al. (2020) [16]

| Ref or Label                                       | Miller et al. (2020) [16]                                                                                                                                              | Aim | assignment to intervention (the 'intention-to-treat' effect) |
|----------------------------------------------------|------------------------------------------------------------------------------------------------------------------------------------------------------------------------|-----|--------------------------------------------------------------|
| Domain                                             | Signalling question                                                                                                                                                    |     | Response                                                     |
| Bias arising from the randomization process        | 1.1 Was the allocation sequence random?                                                                                                                                |     | Y                                                            |
|                                                    | 1.2 Was the allocation sequence concealed until participants were enrolled and assigned to interventions?                                                              |     | Y                                                            |
|                                                    | 1.3 Did baseline differences between intervention groups suggest a problem with the randomization process?                                                             |     | N                                                            |
|                                                    | <b>Risk of bias judgement</b>                                                                                                                                          |     | <b>Low</b>                                                   |
| Bias due to deviations from intended interventions | 2.1. Were participants aware of their assigned intervention during the trial?                                                                                          |     | N                                                            |
|                                                    | 2.2. Were carers and people delivering the interventions aware of participants' assigned intervention during the trial?                                                |     | N                                                            |
|                                                    | 2.3. If Y/PY/NI to 2.1 or 2.2: Were there deviations from the intended intervention that arose because of the experimental context?                                    |     | NA                                                           |
|                                                    | 2.4 If Y/PY to 2.3: Were these deviations likely to have affected the outcome?                                                                                         |     | NA                                                           |
|                                                    | 2.5. If Y/PY/NI to 2.4: Were these deviations from intended intervention balanced between groups?                                                                      |     | NA                                                           |
|                                                    | 2.6 Was an appropriate analysis used to estimate the effect of assignment to intervention?                                                                             |     | Y                                                            |
|                                                    | 2.7 If N/PN/NI to 2.6: Was there potential for a substantial impact (on the result) of the failure to analyse participants in the group to which they were randomized? |     | NA                                                           |
|                                                    | <b>Risk of bias judgement</b>                                                                                                                                          |     | <b>Low</b>                                                   |
| Bias due to missing outcome data                   | 3.1 Were data for this outcome available for all, or nearly all, participants randomized?                                                                              |     | N                                                            |
|                                                    | 3.2 If N/PN/NI to 3.1: Is there evidence that result was not biased by missing outcome data?                                                                           |     | N                                                            |
|                                                    | 3.3 If N/PN to 3.2: Could missingness in the outcome depend on its true value?                                                                                         |     | PY                                                           |
|                                                    | 3.4 If Y/PY/NI to 3.3: Is it likely that missingness in the outcome depended on its true value?                                                                        |     | PN                                                           |
|                                                    | <b>Risk of bias judgement</b>                                                                                                                                          |     | <b>Some concerns</b>                                         |
| Bias in measurement of the outcome                 | 4.1 Was the method of measuring the outcome inappropriate?                                                                                                             |     | PN                                                           |
|                                                    | 4.2 Could measurement or ascertainment of the outcome have differed between intervention groups?                                                                       |     | N                                                            |
|                                                    | 4.3 Were outcome assessors aware of the intervention received by study participants?                                                                                   |     | N                                                            |
|                                                    | 4.4 If Y/PY/NI to 4.3: Could assessment of the outcome have been influenced by knowledge of intervention received?                                                     |     | NA                                                           |
|                                                    | 4.5 If Y/PY/NI to 4.4: Is it likely that assessment of the outcome was influenced by knowledge of intervention received?                                               |     | NA                                                           |

|                                                 |                                                                                                                                                                                     |                      |
|-------------------------------------------------|-------------------------------------------------------------------------------------------------------------------------------------------------------------------------------------|----------------------|
|                                                 | <b>Risk of bias judgement</b>                                                                                                                                                       | <b>Low</b>           |
| <b>Bias in selection of the reported result</b> | 5.1 Were the data that produced this result analysed in accordance with a pre-specified analysis plan that was finalized before unblinded outcome data were available for analysis? | PY                   |
|                                                 | 5.2 ... multiple eligible outcome measurements (e.g. scales, definitions, time points) within the outcome domain?                                                                   | N                    |
|                                                 | 5.3 ... multiple eligible analyses of the data?                                                                                                                                     | N                    |
|                                                 | <b>Risk of bias judgement</b>                                                                                                                                                       | <b>Low</b>           |
| <b>Overall bias</b>                             | <b>Risk of bias judgement</b>                                                                                                                                                       | <b>Some concerns</b> |

**Supplementary Table 10 - Summary table of risk of bias assessment using Cochrane's RoB2 tool of Taylor et al. (2020) [21]**

| Ref or Label                                              | Taylor et al. (2020) [21]                                                                                                                                              | Aim | assignment to intervention (the 'intention-to-treat' effect) |
|-----------------------------------------------------------|------------------------------------------------------------------------------------------------------------------------------------------------------------------------|-----|--------------------------------------------------------------|
| Domain                                                    | Signalling question                                                                                                                                                    |     | Response                                                     |
| <b>Bias arising from the randomization process</b>        | 1.1 Was the allocation sequence random?                                                                                                                                |     | Y                                                            |
|                                                           | 1.2 Was the allocation sequence concealed until participants were enrolled and assigned to interventions?                                                              |     | Y                                                            |
|                                                           | 1.3 Did baseline differences between intervention groups suggest a problem with the randomization process?                                                             |     | PN                                                           |
|                                                           | <b>Risk of bias judgement</b>                                                                                                                                          |     | <b>Low</b>                                                   |
| <b>Bias due to deviations from intended interventions</b> | 2.1. Were participants aware of their assigned intervention during the trial?                                                                                          |     | N                                                            |
|                                                           | 2.2. Were carers and people delivering the interventions aware of participants' assigned intervention during the trial?                                                |     | N                                                            |
|                                                           | 2.3. If Y/PY/NI to 2.1 or 2.2: Were there deviations from the intended intervention that arose because of the experimental context?                                    |     | NA                                                           |
|                                                           | 2.4 If Y/PY to 2.3: Were these deviations likely to have affected the outcome?                                                                                         |     | NA                                                           |
|                                                           | 2.5. If Y/PY/NI to 2.4: Were these deviations from intended intervention balanced between groups?                                                                      |     | NA                                                           |
|                                                           | 2.6 Was an appropriate analysis used to estimate the effect of assignment to intervention?                                                                             |     | PY                                                           |
|                                                           | 2.7 If N/PN/NI to 2.6: Was there potential for a substantial impact (on the result) of the failure to analyse participants in the group to which they were randomized? |     | NA                                                           |
|                                                           | <b>Risk of bias judgement</b>                                                                                                                                          |     | <b>Low</b>                                                   |
| <b>Bias due to missing outcome data</b>                   | 3.1 Were data for this outcome available for all, or nearly all, participants randomized?                                                                              |     | N                                                            |
|                                                           | 3.2 If N/PN/NI to 3.1: Is there evidence that result was not biased by missing outcome data?                                                                           |     | N                                                            |
|                                                           | 3.3 If N/PN to 3.2: Could missingness in the outcome depend on its true value?                                                                                         |     | Y                                                            |
|                                                           | 3.4 If Y/PY/NI to 3.3: Is it likely that missingness in the outcome depended on its true value?                                                                        |     | PN                                                           |
|                                                           | <b>Risk of bias judgement</b>                                                                                                                                          |     | <b>Some concerns</b>                                         |
| <b>Bias in measurement of the outcome</b>                 | 4.1 Was the method of measuring the outcome inappropriate?                                                                                                             |     | N                                                            |
|                                                           | 4.2 Could measurement or ascertainment of the outcome have differed between intervention groups?                                                                       |     | N                                                            |
|                                                           | 4.3 Were outcome assessors aware of the intervention received by study participants?                                                                                   |     | NI                                                           |
|                                                           | 4.4 If Y/PY/NI to 4.3: Could assessment of the outcome have been influenced by knowledge of intervention received?                                                     |     | Y                                                            |
|                                                           | 4.5 If Y/PY/NI to 4.4: Is it likely that assessment of the outcome was influenced by knowledge of intervention received?                                               |     | PN                                                           |

|                                                 |                                                                                                                                                                                     |                      |
|-------------------------------------------------|-------------------------------------------------------------------------------------------------------------------------------------------------------------------------------------|----------------------|
|                                                 | <b>Risk of bias judgement</b>                                                                                                                                                       | <b>Some concerns</b> |
| <b>Bias in selection of the reported result</b> | 5.1 Were the data that produced this result analysed in accordance with a pre-specified analysis plan that was finalized before unblinded outcome data were available for analysis? | Y                    |
|                                                 | 5.2 ... multiple eligible outcome measurements (e.g. scales, definitions, time points) within the outcome domain?                                                                   | N                    |
|                                                 | 5.3 ... multiple eligible analyses of the data?                                                                                                                                     | N                    |
|                                                 | <b>Risk of bias judgement</b>                                                                                                                                                       | <b>Low</b>           |
| <b>Overall bias</b>                             | <b>Risk of bias judgement</b>                                                                                                                                                       | <b>Some concerns</b> |

Supplementary Table 11 - Summary table of risk of bias assessment using Cochrane's RoB2 tool of Thiele et al. (2018) [18]

| Ref or Label                                       | Thiele et al. (2018) [18]                                                                                                                                              | Aim | assignment to intervention (the 'intention-to-treat' effect) |
|----------------------------------------------------|------------------------------------------------------------------------------------------------------------------------------------------------------------------------|-----|--------------------------------------------------------------|
| Domain                                             | Signalling question                                                                                                                                                    |     | Response                                                     |
| Bias arising from the randomization process        | 1.1 Was the allocation sequence random?                                                                                                                                |     | Y                                                            |
|                                                    | 1.2 Was the allocation sequence concealed until participants were enrolled and assigned to interventions?                                                              |     | Y                                                            |
|                                                    | 1.3 Did baseline differences between intervention groups suggest a problem with the randomization process?                                                             |     | N                                                            |
|                                                    | <b>Risk of bias judgement</b>                                                                                                                                          |     | <b>Low</b>                                                   |
| Bias due to deviations from intended interventions | 2.1. Were participants aware of their assigned intervention during the trial?                                                                                          |     | N                                                            |
|                                                    | 2.2. Were carers and people delivering the interventions aware of participants' assigned intervention during the trial?                                                |     | N                                                            |
|                                                    | 2.3. If Y/PY/NI to 2.1 or 2.2: Were there deviations from the intended intervention that arose because of the experimental context?                                    |     | NA                                                           |
|                                                    | 2.4 If Y/PY to 2.3: Were these deviations likely to have affected the outcome?                                                                                         |     | NA                                                           |
|                                                    | 2.5. If Y/PY/NI to 2.4: Were these deviations from intended intervention balanced between groups?                                                                      |     | NA                                                           |
|                                                    | 2.6 Was an appropriate analysis used to estimate the effect of assignment to intervention?                                                                             |     | Y                                                            |
|                                                    | 2.7 If N/PN/NI to 2.6: Was there potential for a substantial impact (on the result) of the failure to analyse participants in the group to which they were randomized? |     | NA                                                           |
|                                                    | <b>Risk of bias judgement</b>                                                                                                                                          |     | <b>Low</b>                                                   |
| Bias due to missing outcome data                   | 3.1 Were data for this outcome available for all, or nearly all, participants randomized?                                                                              |     | N                                                            |
|                                                    | 3.2 If N/PN/NI to 3.1: Is there evidence that result was not biased by missing outcome data?                                                                           |     | N                                                            |
|                                                    | 3.3 If N/PN to 3.2: Could missingness in the outcome depend on its true value?                                                                                         |     | Y                                                            |
|                                                    | 3.4 If Y/PY/NI to 3.3: Is it likely that missingness in the outcome depended on its true value?                                                                        |     | PN                                                           |
|                                                    | <b>Risk of bias judgement</b>                                                                                                                                          |     | <b>Some concerns</b>                                         |
| Bias in measurement of the outcome                 | 4.1 Was the method of measuring the outcome inappropriate?                                                                                                             |     | N                                                            |
|                                                    | 4.2 Could measurement or ascertainment of the outcome have differed between intervention groups?                                                                       |     | N                                                            |
|                                                    | 4.3 Were outcome assessors aware of the intervention received by study participants?                                                                                   |     | N                                                            |
|                                                    | 4.4 If Y/PY/NI to 4.3: Could assessment of the outcome have been influenced by knowledge of intervention received?                                                     |     | NA                                                           |
|                                                    | 4.5 If Y/PY/NI to 4.4: Is it likely that assessment of the outcome was influenced by knowledge of intervention received?                                               |     | NA                                                           |

|                                                 |                                                                                                                                                                                     |                      |
|-------------------------------------------------|-------------------------------------------------------------------------------------------------------------------------------------------------------------------------------------|----------------------|
|                                                 | <b>Risk of bias judgement</b>                                                                                                                                                       | <b>Low</b>           |
| <b>Bias in selection of the reported result</b> | 5.1 Were the data that produced this result analysed in accordance with a pre-specified analysis plan that was finalized before unblinded outcome data were available for analysis? | PY                   |
|                                                 | 5.2 ... multiple eligible outcome measurements (e.g. scales, definitions, time points) within the outcome domain?                                                                   | N                    |
|                                                 | 5.3 ... multiple eligible analyses of the data?                                                                                                                                     | PN                   |
|                                                 | <b>Risk of bias judgement</b>                                                                                                                                                       | <b>Low</b>           |
| <b>Overall bias</b>                             | <b>Risk of bias judgement</b>                                                                                                                                                       | <b>Some concerns</b> |
